# Supplementary material for: De Novo Assembly, Gene Annotation and Marker Development Using Illumina Paired-End Transcriptome Sequences in Celery (Apium graveolens L.)
Source: PLoS One. 2013 Feb 28;8(2):e57686. doi: 10.1371/journal.pone.0057686 (PMC3585167; doi:10.1371/journal.pone.0057686)
Supplement: Table S5 — The identified genes involved in cellulose and pectin metabolism. (XLS) [file pone.0057686.s005.xls]

## Sheet: Sheet1
Additional Table S5 The identified genes involved in cellulose and pectin metabolism
cellulose
Unigene name	Annotation	Pathway
comp30477_c0_seq1	cellulose synthase (EC:2.4.1.12); K00770 1,4-beta-D-xylan synthase [EC:2.4.2.24]	|Metabolism; Carbohydrate Metabolism; Amino sugar and nucleotide sugar metabolism [PATH:ko00520-Map:ko00520];|Metabolism; Carbohydrate Metabolism; Starch and sucrose metabolism [PATH:ko00500-Map:ko00500];|Metabolism; Glycan Biosynthesis and Metabolism; Glycosyltransferases [BR:ko01003];|
comp1990_c0_seq1	hypothetical protein LOC100255463; K10999 cellulose synthase A [EC:2.4.1.12]	|Metabolism; Glycan Biosynthesis and Metabolism; Glycosyltransferases [BR:ko01003];|
comp1990_c0_seq2	hypothetical protein LOC100255463; K10999 cellulose synthase A [EC:2.4.1.12]	|Metabolism; Glycan Biosynthesis and Metabolism; Glycosyltransferases [BR:ko01003];|
comp660_c0_seq1	hypothetical protein LOC100254408; K10999 cellulose synthase A [EC:2.4.1.12]	|Metabolism; Glycan Biosynthesis and Metabolism; Glycosyltransferases [BR:ko01003];|
comp660_c0_seq2	hypothetical protein LOC100254408; K10999 cellulose synthase A [EC:2.4.1.12]	|Metabolism; Glycan Biosynthesis and Metabolism; Glycosyltransferases [BR:ko01003];|
comp660_c0_seq3	Cellulose synthase A catalytic subunit 6 [UDP-forming], putative (EC:2.4.1.12); K10999 cellulose synthase A [EC:2.4.1.12]	|Metabolism; Glycan Biosynthesis and Metabolism; Glycosyltransferases [BR:ko01003];|
comp660_c0_seq4	Cellulose synthase A catalytic subunit 6 [UDP-forming], putative (EC:2.4.1.12); K10999 cellulose synthase A [EC:2.4.1.12]	|Metabolism; Glycan Biosynthesis and Metabolism; Glycosyltransferases [BR:ko01003];|
comp660_c0_seq5	hypothetical protein LOC100254408; K10999 cellulose synthase A [EC:2.4.1.12]	|Metabolism; Glycan Biosynthesis and Metabolism; Glycosyltransferases [BR:ko01003];|
comp660_c0_seq6	hypothetical protein LOC100254408; K10999 cellulose synthase A [EC:2.4.1.12]	|Metabolism; Glycan Biosynthesis and Metabolism; Glycosyltransferases [BR:ko01003];|
comp660_c0_seq8	Cellulose synthase A catalytic subunit 6 [UDP-forming], putative (EC:2.4.1.12); K10999 cellulose synthase A [EC:2.4.1.12]	|Metabolism; Glycan Biosynthesis and Metabolism; Glycosyltransferases [BR:ko01003];|
comp319_c0_seq1	cellulose synthase (EC:2.4.1.12); K10999 cellulose synthase A [EC:2.4.1.12]	|Metabolism; Glycan Biosynthesis and Metabolism; Glycosyltransferases [BR:ko01003];|
comp319_c0_seq2	cellulose synthase (EC:2.4.1.12); K10999 cellulose synthase A [EC:2.4.1.12]	|Metabolism; Glycan Biosynthesis and Metabolism; Glycosyltransferases [BR:ko01003];|
comp1186_c0_seq1	hypothetical protein LOC100255463; K10999 cellulose synthase A [EC:2.4.1.12]	|Metabolism; Glycan Biosynthesis and Metabolism; Glycosyltransferases [BR:ko01003];|
comp27343_c0_seq1	bcsC, ECK3515, JW5942, yhjL; cellulose synthase subunit
comp38080_c0_seq1	Cellulose synthase A catalytic subunit 3 [UDP-forming], putative (EC:2.4.1.12); K10999 cellulose synthase A [EC:2.4.1.12]	|Metabolism; Glycan Biosynthesis and Metabolism; Glycosyltransferases [BR:ko01003];|
comp15554_c0_seq1	hypothetical protein LOC100241197; K10999 cellulose synthase A [EC:2.4.1.12]	|Metabolism; Glycan Biosynthesis and Metabolism; Glycosyltransferases [BR:ko01003];|
comp14627_c0_seq1	CESA4; CESA4 (CELLULOSE SYNTHASE A4); cellulose synthase/ transferase, transferring glycosyl groups (EC:2.4.1.12); K10999 cellulose synthase A [EC:2.4.1.12]	|Metabolism; Glycan Biosynthesis and Metabolism; Glycosyltransferases [BR:ko01003];|
comp9193_c0_seq1	ATCSLC04 (CELLULOSE-SYNTHASE LIKE C4); cellulose synthase/ transferase, transferring glycosyl groups
comp9904_c0_seq1	hypothetical protein LOC100241197; K10999 cellulose synthase A [EC:2.4.1.12]	|Metabolism; Glycan Biosynthesis and Metabolism; Glycosyltransferases [BR:ko01003];|
comp25887_c0_seq1	PtrCSLD1; cellulose synthase-like protein (EC:2.4.1.12)
comp7336_c0_seq1	CSLD3; CSLD3 (CELLULOSE SYNTHASE-LIKE D3); cellulose synthase/ transferase, transferring glycosyl groups (EC:2.4.1.12)
comp37034_c0_seq1	hypothetical protein LOC100256811; K10999 cellulose synthase A [EC:2.4.1.12]	|Metabolism; Glycan Biosynthesis and Metabolism; Glycosyltransferases [BR:ko01003];|
comp37006_c0_seq1	cellulose synthase (EC:2.4.1.12); K00770 1,4-beta-D-xylan synthase [EC:2.4.2.24]	|Metabolism; Carbohydrate Metabolism; Amino sugar and nucleotide sugar metabolism [PATH:ko00520-Map:ko00520];|Metabolism; Carbohydrate Metabolism; Starch and sucrose metabolism [PATH:ko00500-Map:ko00500];|Metabolism; Glycan Biosynthesis and Metabolism; Glycosyltransferases [BR:ko01003];|
comp21171_c0_seq1	hypothetical protein LOC100255463; K10999 cellulose synthase A [EC:2.4.1.12]	|Metabolism; Glycan Biosynthesis and Metabolism; Glycosyltransferases [BR:ko01003];|
comp21171_c0_seq2	hypothetical protein LOC100255463; K10999 cellulose synthase A [EC:2.4.1.12]	|Metabolism; Glycan Biosynthesis and Metabolism; Glycosyltransferases [BR:ko01003];|
comp32389_c0_seq1	cellulose synthase A (EC:2.4.1.12); K10999 cellulose synthase A [EC:2.4.1.12]	|Metabolism; Glycan Biosynthesis and Metabolism; Glycosyltransferases [BR:ko01003];|
comp33208_c0_seq1	bcsA; cellulose synthase catalytic subunit (EC:2.4.1.12); K00694 cellulose synthase (UDP-forming) [EC:2.4.1.12]	|Metabolism; Carbohydrate Metabolism; Starch and sucrose metabolism [PATH:ko00500-Map:ko00500];|Metabolism; Glycan Biosynthesis and Metabolism; Glycosyltransferases [BR:ko01003];|
comp32567_c0_seq1	bcsA; cellulose synthase catalytic subunit (EC:2.4.1.12); K00694 cellulose synthase (UDP-forming) [EC:2.4.1.12]	|Metabolism; Carbohydrate Metabolism; Starch and sucrose metabolism [PATH:ko00500-Map:ko00500];|Metabolism; Glycan Biosynthesis and Metabolism; Glycosyltransferases [BR:ko01003];|
comp10998_c0_seq1	bcsA; cellulose synthase catalytic subunit (EC:2.4.1.12); K00694 cellulose synthase (UDP-forming) [EC:2.4.1.12]	|Metabolism; Carbohydrate Metabolism; Starch and sucrose metabolism [PATH:ko00500-Map:ko00500];|Metabolism; Glycan Biosynthesis and Metabolism; Glycosyltransferases [BR:ko01003];|
comp4861_c0_seq1	hypothetical protein LOC100255463; K10999 cellulose synthase A [EC:2.4.1.12]	|Metabolism; Glycan Biosynthesis and Metabolism; Glycosyltransferases [BR:ko01003];|
comp4432_c0_seq1	cellulose synthase (EC:2.4.1.12); K10999 cellulose synthase A [EC:2.4.1.12]	|Metabolism; Glycan Biosynthesis and Metabolism; Glycosyltransferases [BR:ko01003];|
comp4514_c0_seq1	hypothetical protein LOC100255463; K10999 cellulose synthase A [EC:2.4.1.12]	|Metabolism; Glycan Biosynthesis and Metabolism; Glycosyltransferases [BR:ko01003];|
comp5646_c0_seq1	hypothetical protein LOC100254408; K10999 cellulose synthase A [EC:2.4.1.12]	|Metabolism; Glycan Biosynthesis and Metabolism; Glycosyltransferases [BR:ko01003];|
comp34033_c0_seq1	cellulose synthase, putative (EC:2.4.1.12)
comp35425_c0_seq1	bcsA; cellulose synthase catalytic subunit (EC:2.4.1.12); K00694 cellulose synthase (UDP-forming) [EC:2.4.1.12]	|Metabolism; Carbohydrate Metabolism; Starch and sucrose metabolism [PATH:ko00500-Map:ko00500];|Metabolism; Glycan Biosynthesis and Metabolism; Glycosyltransferases [BR:ko01003];|
comp41650_c0_seq1	CESA4; CESA4 (CELLULOSE SYNTHASE A4); cellulose synthase/ transferase, transferring glycosyl groups (EC:2.4.1.12); K10999 cellulose synthase A [EC:2.4.1.12]	|Metabolism; Glycan Biosynthesis and Metabolism; Glycosyltransferases [BR:ko01003];|
comp2076_c0_seq1	hypothetical protein LOC100255463; K10999 cellulose synthase A [EC:2.4.1.12]	|Metabolism; Glycan Biosynthesis and Metabolism; Glycosyltransferases [BR:ko01003];|
pectin
Unigene name	Annotation	Pathway
comp31831_c0_seq1	hypothetical protein LOC100267743; K01051 pectinesterase [EC:3.1.1.11]	|Metabolism; Carbohydrate Metabolism; Pentose and glucuronate interconversions [PATH:ko00040-Map:ko00040];|Metabolism; Carbohydrate Metabolism; Starch and sucrose metabolism [PATH:ko00500-Map:ko00500];|
comp876_c0_seq1	hypothetical protein; K01051 pectinesterase [EC:3.1.1.11]	|Metabolism; Carbohydrate Metabolism; Pentose and glucuronate interconversions [PATH:ko00040-Map:ko00040];|Metabolism; Carbohydrate Metabolism; Starch and sucrose metabolism [PATH:ko00500-Map:ko00500];|
comp14608_c0_seq1	similar to pectinesterase, putative; K01051 pectinesterase [EC:3.1.1.11]	|Metabolism; Carbohydrate Metabolism; Pentose and glucuronate interconversions [PATH:ko00040-Map:ko00040];|Metabolism; Carbohydrate Metabolism; Starch and sucrose metabolism [PATH:ko00500-Map:ko00500];|
comp15576_c0_seq1	pectin acetylesterase, putative
comp9448_c0_seq1	pectin acetylesterase, putative
comp8872_c0_seq1	hypothetical protein; K01051 pectinesterase [EC:3.1.1.11]	|Metabolism; Carbohydrate Metabolism; Pentose and glucuronate interconversions [PATH:ko00040-Map:ko00040];|Metabolism; Carbohydrate Metabolism; Starch and sucrose metabolism [PATH:ko00500-Map:ko00500];|
comp9245_c0_seq1	glycoside hydrolase family 28 protein / polygalacturonase (pectinase) family protein
comp9232_c0_seq1	hypothetical protein LOC100251413; K01051 pectinesterase [EC:3.1.1.11]	|Metabolism; Carbohydrate Metabolism; Pentose and glucuronate interconversions [PATH:ko00040-Map:ko00040];|Metabolism; Carbohydrate Metabolism; Starch and sucrose metabolism [PATH:ko00500-Map:ko00500];|
comp7235_c0_seq1	Pectinesterase precursor, putative (EC:3.1.1.11); K01051 pectinesterase [EC:3.1.1.11]	|Metabolism; Carbohydrate Metabolism; Pentose and glucuronate interconversions [PATH:ko00040-Map:ko00040];|Metabolism; Carbohydrate Metabolism; Starch and sucrose metabolism [PATH:ko00500-Map:ko00500];|
comp6443_c0_seq1	Pectinesterase-2 precursor, putative (EC:3.1.1.11); K01051 pectinesterase [EC:3.1.1.11]	|Metabolism; Carbohydrate Metabolism; Pentose and glucuronate interconversions [PATH:ko00040-Map:ko00040];|Metabolism; Carbohydrate Metabolism; Starch and sucrose metabolism [PATH:ko00500-Map:ko00500];|
comp6690_c0_seq1	pectin methylesterase PME1; K01051 pectinesterase [EC:3.1.1.11]	|Metabolism; Carbohydrate Metabolism; Pentose and glucuronate interconversions [PATH:ko00040-Map:ko00040];|Metabolism; Carbohydrate Metabolism; Starch and sucrose metabolism [PATH:ko00500-Map:ko00500];|
comp36203_c0_seq1	Pectinesterase-2 precursor, putative (EC:3.1.1.11); K01051 pectinesterase [EC:3.1.1.11]	|Metabolism; Carbohydrate Metabolism; Pentose and glucuronate interconversions [PATH:ko00040-Map:ko00040];|Metabolism; Carbohydrate Metabolism; Starch and sucrose metabolism [PATH:ko00500-Map:ko00500];|
comp36377_c0_seq1	pectinesterase family protein (EC:3.1.1.11); K01051 pectinesterase [EC:3.1.1.11]	|Metabolism; Carbohydrate Metabolism; Pentose and glucuronate interconversions [PATH:ko00040-Map:ko00040];|Metabolism; Carbohydrate Metabolism; Starch and sucrose metabolism [PATH:ko00500-Map:ko00500];|
comp20235_c0_seq1	hypothetical protein LOC100251413; K01051 pectinesterase [EC:3.1.1.11]	|Metabolism; Carbohydrate Metabolism; Pentose and glucuronate interconversions [PATH:ko00040-Map:ko00040];|Metabolism; Carbohydrate Metabolism; Starch and sucrose metabolism [PATH:ko00500-Map:ko00500];|
comp21736_c0_seq1	Pectinesterase-2 precursor, putative (EC:3.1.1.11); K01051 pectinesterase [EC:3.1.1.11]	|Metabolism; Carbohydrate Metabolism; Pentose and glucuronate interconversions [PATH:ko00040-Map:ko00040];|Metabolism; Carbohydrate Metabolism; Starch and sucrose metabolism [PATH:ko00500-Map:ko00500];|
comp20274_c0_seq1	pectinacetylesterase, putative
comp21619_c0_seq1	pectin acetylesterase, putative
comp20625_c0_seq1	pectinesterase family protein (EC:3.1.1.11); K01051 pectinesterase [EC:3.1.1.11]	|Metabolism; Carbohydrate Metabolism; Pentose and glucuronate interconversions [PATH:ko00040-Map:ko00040];|Metabolism; Carbohydrate Metabolism; Starch and sucrose metabolism [PATH:ko00500-Map:ko00500];|
comp32706_c0_seq1	similar to pectinesterase, putative; K01051 pectinesterase [EC:3.1.1.11]	|Metabolism; Carbohydrate Metabolism; Pentose and glucuronate interconversions [PATH:ko00040-Map:ko00040];|Metabolism; Carbohydrate Metabolism; Starch and sucrose metabolism [PATH:ko00500-Map:ko00500];|
comp32897_c0_seq1	pectinesterase family protein (EC:3.1.1.11)
comp29897_c0_seq1	pectin methylesterase, putative (EC:3.1.1.11); K01051 pectinesterase [EC:3.1.1.11]	|Metabolism; Carbohydrate Metabolism; Pentose and glucuronate interconversions [PATH:ko00040-Map:ko00040];|Metabolism; Carbohydrate Metabolism; Starch and sucrose metabolism [PATH:ko00500-Map:ko00500];|
comp23190_c0_seq1	pectin acetylesterase, putative
comp22817_c0_seq1	Pectinesterase-3 precursor, putative (EC:3.1.1.11); K01051 pectinesterase [EC:3.1.1.11]	|Metabolism; Carbohydrate Metabolism; Pentose and glucuronate interconversions [PATH:ko00040-Map:ko00040];|Metabolism; Carbohydrate Metabolism; Starch and sucrose metabolism [PATH:ko00500-Map:ko00500];|
comp23227_c0_seq1	Pectinesterase PPE8B precursor, putative (EC:3.1.1.11); K01051 pectinesterase [EC:3.1.1.11]	|Metabolism; Carbohydrate Metabolism; Pentose and glucuronate interconversions [PATH:ko00040-Map:ko00040];|Metabolism; Carbohydrate Metabolism; Starch and sucrose metabolism [PATH:ko00500-Map:ko00500];|
comp10759_c0_seq1	pectin methylesterase PME1; K01051 pectinesterase [EC:3.1.1.11]	|Metabolism; Carbohydrate Metabolism; Pentose and glucuronate interconversions [PATH:ko00040-Map:ko00040];|Metabolism; Carbohydrate Metabolism; Starch and sucrose metabolism [PATH:ko00500-Map:ko00500];|
comp11671_c0_seq1	pectinesterase family protein (EC:3.1.1.11); K01051 pectinesterase [EC:3.1.1.11]	|Metabolism; Carbohydrate Metabolism; Pentose and glucuronate interconversions [PATH:ko00040-Map:ko00040];|Metabolism; Carbohydrate Metabolism; Starch and sucrose metabolism [PATH:ko00500-Map:ko00500];|
comp10854_c0_seq1	pectinesterase family protein (EC:3.1.1.11)
comp4281_c0_seq1	pectinesterase
comp4713_c0_seq1	Pectinesterase-2 precursor, putative (EC:3.1.1.11); K01051 pectinesterase [EC:3.1.1.11]	|Metabolism; Carbohydrate Metabolism; Pentose and glucuronate interconversions [PATH:ko00040-Map:ko00040];|Metabolism; Carbohydrate Metabolism; Starch and sucrose metabolism [PATH:ko00500-Map:ko00500];|
comp4952_c0_seq1	pectinesterase family protein (EC:3.1.1.11); K01051 pectinesterase [EC:3.1.1.11]	|Metabolism; Carbohydrate Metabolism; Pentose and glucuronate interconversions [PATH:ko00040-Map:ko00040];|Metabolism; Carbohydrate Metabolism; Starch and sucrose metabolism [PATH:ko00500-Map:ko00500];|
comp34847_c0_seq1	Pectinesterase-2 precursor, putative (EC:3.1.1.11); K01051 pectinesterase [EC:3.1.1.11]	|Metabolism; Carbohydrate Metabolism; Pentose and glucuronate interconversions [PATH:ko00040-Map:ko00040];|Metabolism; Carbohydrate Metabolism; Starch and sucrose metabolism [PATH:ko00500-Map:ko00500];|
comp41102_c0_seq1	pectinesterase
comp40696_c0_seq1	hypothetical protein LOC100255703; K01051 pectinesterase [EC:3.1.1.11]	|Metabolism; Carbohydrate Metabolism; Pentose and glucuronate interconversions [PATH:ko00040-Map:ko00040];|Metabolism; Carbohydrate Metabolism; Starch and sucrose metabolism [PATH:ko00500-Map:ko00500];|
comp41840_c0_seq1	hypothetical protein LOC100255703; K01051 pectinesterase [EC:3.1.1.11]	|Metabolism; Carbohydrate Metabolism; Pentose and glucuronate interconversions [PATH:ko00040-Map:ko00040];|Metabolism; Carbohydrate Metabolism; Starch and sucrose metabolism [PATH:ko00500-Map:ko00500];|
comp19138_c0_seq1	pectinesterase family protein (EC:3.1.1.11); K01051 pectinesterase [EC:3.1.1.11]	|Metabolism; Carbohydrate Metabolism; Pentose and glucuronate interconversions [PATH:ko00040-Map:ko00040];|Metabolism; Carbohydrate Metabolism; Starch and sucrose metabolism [PATH:ko00500-Map:ko00500];|
comp19138_c0_seq2	pectinesterase family protein (EC:3.1.1.11); K01051 pectinesterase [EC:3.1.1.11]	|Metabolism; Carbohydrate Metabolism; Pentose and glucuronate interconversions [PATH:ko00040-Map:ko00040];|Metabolism; Carbohydrate Metabolism; Starch and sucrose metabolism [PATH:ko00500-Map:ko00500];|
comp2105_c0_seq1	Pectinesterase-3 precursor, putative (EC:3.1.1.11); K01051 pectinesterase [EC:3.1.1.11]	|Metabolism; Carbohydrate Metabolism; Pentose and glucuronate interconversions [PATH:ko00040-Map:ko00040];|Metabolism; Carbohydrate Metabolism; Starch and sucrose metabolism [PATH:ko00500-Map:ko00500];|
comp2632_c0_seq1	similar to pectin methylesterase 1
comp3589_c0_seq1	pectinesterase family protein (EC:3.1.1.11); K01051 pectinesterase [EC:3.1.1.11]	|Metabolism; Carbohydrate Metabolism; Pentose and glucuronate interconversions [PATH:ko00040-Map:ko00040];|Metabolism; Carbohydrate Metabolism; Starch and sucrose metabolism [PATH:ko00500-Map:ko00500];|
comp2397_c0_seq1	similar to pectin methylesterase 1
comp12537_c0_seq1	pectinesterase family protein (EC:3.1.1.11); K01051 pectinesterase [EC:3.1.1.11]	|Metabolism; Carbohydrate Metabolism; Pentose and glucuronate interconversions [PATH:ko00040-Map:ko00040];|Metabolism; Carbohydrate Metabolism; Starch and sucrose metabolism [PATH:ko00500-Map:ko00500];|
comp13735_c0_seq1	Pectinesterase precursor, putative (EC:3.1.1.11); K01051 pectinesterase [EC:3.1.1.11]	|Metabolism; Carbohydrate Metabolism; Pentose and glucuronate interconversions [PATH:ko00040-Map:ko00040];|Metabolism; Carbohydrate Metabolism; Starch and sucrose metabolism [PATH:ko00500-Map:ko00500];|
comp13829_c0_seq1	hypothetical protein; K01051 pectinesterase [EC:3.1.1.11]	|Metabolism; Carbohydrate Metabolism; Pentose and glucuronate interconversions [PATH:ko00040-Map:ko00040];|Metabolism; Carbohydrate Metabolism; Starch and sucrose metabolism [PATH:ko00500-Map:ko00500];|
comp12320_c0_seq1	Pectinesterase precursor, putative (EC:3.1.1.11); K01051 pectinesterase [EC:3.1.1.11]	|Metabolism; Carbohydrate Metabolism; Pentose and glucuronate interconversions [PATH:ko00040-Map:ko00040];|Metabolism; Carbohydrate Metabolism; Starch and sucrose metabolism [PATH:ko00500-Map:ko00500];|
comp12320_c0_seq2	Pectinesterase precursor, putative (EC:3.1.1.11); K01051 pectinesterase [EC:3.1.1.11]	|Metabolism; Carbohydrate Metabolism; Pentose and glucuronate interconversions [PATH:ko00040-Map:ko00040];|Metabolism; Carbohydrate Metabolism; Starch and sucrose metabolism [PATH:ko00500-Map:ko00500];|
